# Supplementary material for: Crystal structures, topologies and luminescent properties of three Zn(ii)/Cd(ii) coordination networks based on naphthalene-2,6-dicarboxylic acid and different bis(imidazole) linkers
Source: Royal Society of Chemistry journal article supplement (doi:10.1039/c4ra14862b), 2015-01-01

***Supporting Information for RSC Advances***

**Crystal structures, topologies and luminescent properties of three Zn(II)/Cd(II) coordination networks based on naphthalene-2,6-dicarboxylic acid and different bis(imidazole) linkers**

**Zhi-Hao Yan<sup>a,b</sup>, Wen Wang<sup>a</sup>, Liangliang Zhang<sup>\*,a</sup>, Xiaowei Zhang<sup>a,b</sup>, Lei Wang<sup>\*,b</sup>, Rongming wang<sup>a</sup> and Daofeng Sun<sup>a</sup>**

<sup>a</sup>State Key Laboratory of Heavy Oil Processing, China University of Petroleum (East China), College of Science, China University of Petroleum (East China), Qingdao Shandong 266580, People's Republic of China.

<sup>b</sup>Key Laboratory of Eco-chemical Engineering, Ministry of Education, College of Chemistry and Molecular Engineering, Qingdao University of Science and Technology, Qingdao 266042, P. R. China.

E-mail: liangliangzhang@upc.edu.cn; inorchemwl@126.com.

Received (in XXX, XXX) Xth XXXXXXXXX 2014, Accepted Xth XXXXXXXXX 2014

**(1) Fig. S1: The powder XRD patterns and the simulated one from the single-crystal diffraction data for compounds 1-3**

(2) Fig. S2 IR spectrum of 1-3.

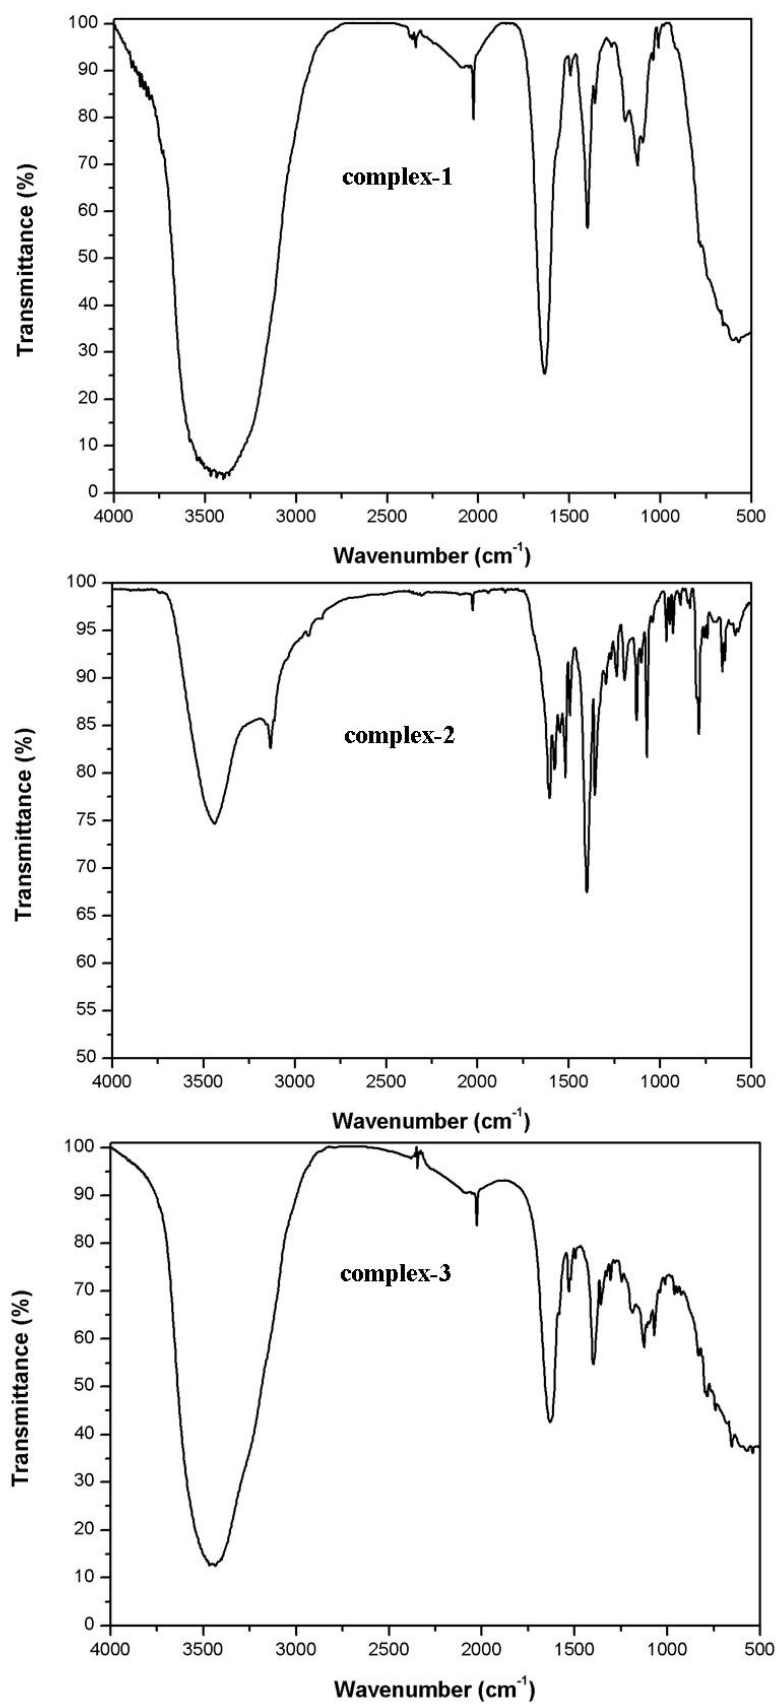

(3) Fig. S3: The infinite 1D zig-zag chain formed by Zn(II) cation centers and bip ligands.

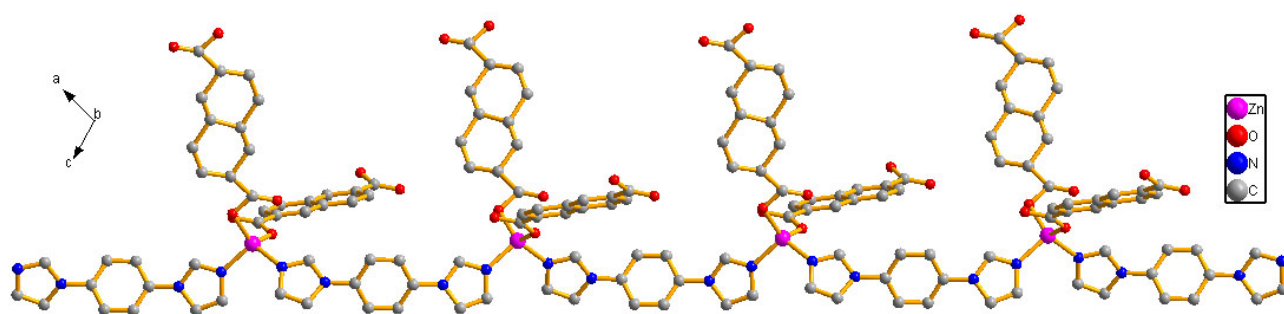

Supplement: c4ra14862b1.pdf [file c4ra14862b1.pdf]
